# Supplementary material
Source: bioRxiv or medRxiv preprint supplement (https://medrxiv.org/highwire/filestream/96956/field_highwire_adjunct_files/0/2020.08.25.20182105-1.pdf)

## **Supplemental Material**

**Title:** DNA Methylation Architecture of the *ACE2* gene in Nasal Cells

**Authors:** Andres Cardenas, Sheryl L. Rifas-Shiman, Joanne E. Sordillo, Dawn L. DeMeo,  
Andrea A Baccarelli, Marie-France Hivert, Diane R Gold, Emily Oken

**Table S1.** Demographic characteristics among 547 Project Viva participants with nasal DNA methylation measurements.

| Participant characteristics                 | N (%) or mean (SD) |
|---------------------------------------------|--------------------|
| Sex                                         |                    |
| Male                                        | 277 (50.6%)        |
| Female                                      | 270 (49.4%)        |
| Age (years)                                 | 12.95 (0.66)       |
| Race/Ethnicity                              |                    |
| White                                       | 367 (67.1%)        |
| Black                                       | 89 (16.3%)         |
| Hispanic                                    | 23 (4.2%)          |
| Asian                                       | 17 (3.1%)          |
| More than one race/Other                    | 51 (9.3%)          |
| DNA methylation telomere length (DNAmTL) Kb | 7.11 (0.38)        |
| DNAmTL residuals                            | 0 (0.38)           |
| Skin and Blood Clock Epigenetic age (years) | 15.7 (1.94)        |
| Skin and blood clock residuals              | 0 (1.77)           |

**Table S2.** Differences in %-DNAm of the *ACE2* gene in nasal cells by chronological age in years stratified by sex

| CpG        | Females           |              |      | Males             |          |      |
|------------|-------------------|--------------|------|-------------------|----------|------|
|            | %-DNAm difference | <i>p</i>     | FDR  | %-DNAm difference | <i>p</i> | FDR  |
| cg18458833 | -0.02             | 0.76         | 0.89 | -0.11             | 0.43     | 0.89 |
| cg21598868 | -0.89             | 0.15         | 0.32 | -0.04             | 0.77     | 0.89 |
| cg18877734 | -0.34             | 0.06         | 0.18 | -0.18             | 0.34     | 0.86 |
| cg03536816 | <b>-2.48</b>      | <b>0.018</b> | 0.16 | -0.91             | 0.29     | 0.86 |
| cg08559914 | 0.01              | 0.96         | 0.96 | -0.24             | 0.49     | 0.89 |
| cg16734967 | <b>-1.85</b>      | <b>0.048</b> | 0.18 | -0.62             | 0.29     | 0.86 |
| cg10408040 | -0.1              | 0.66         | 0.83 | 0.03              | 0.73     | 0.89 |
| cg05241917 | -0.42             | 0.19         | 0.36 | -0.12             | 0.62     | 0.89 |
| cg20119767 | -0.21             | 0.59         | 0.81 | 0.34              | 0.31     | 0.86 |
| cg04013915 | -1.48             | 0.07         | 0.18 | 0.05              | 0.93     | 0.93 |
| cg16716680 | -0.03             | 0.95         | 0.96 | 0.17              | 0.75     | 0.89 |
| cg25176872 | -0.56             | 0.23         | 0.39 | 0.01              | 0.93     | 0.93 |
| cg22422976 | <b>-1.19</b>      | <b>0.02</b>  | 0.16 | -0.04             | 0.75     | 0.89 |
| cg05039749 | -0.11             | 0.34         | 0.52 | -0.05             | 0.19     | 0.86 |
| cg23232263 | -0.96             | 0.04         | 0.18 | -0.30             | 0.05     | 0.80 |

**Table S3.** Differences in %-DNAm in Asian and more than one race relative to white participants adjusted for age and stratified by sex.

| CpG        | Females           |          |      |                    |          |      | Males             |          |      |                    |          |      |
|------------|-------------------|----------|------|--------------------|----------|------|-------------------|----------|------|--------------------|----------|------|
|            | Asian             |          |      | More than one race |          |      | Asian             |          |      | More than one race |          |      |
|            | %-DNAm difference | <i>p</i> | FDR  | %-DNAm difference  | <i>p</i> | FDR  | %-DNAm difference | <i>p</i> | FDR  | %-DNAm difference  | <i>p</i> | FDR  |
| cg18458833 | -0.22             | 0.27     | 0.87 | -0.14              | 0.41     | 0.56 | 0.33              | 0.48     | 0.96 | -0.35              | 0.45     | 0.79 |
| cg21598868 | -0.36             | 0.87     | 0.87 | 1.72               | 0.25     | 0.56 | 0.20              | 0.66     | 0.96 | -0.27              | 0.47     | 0.79 |
| cg18877734 | -0.28             | 0.66     | 0.87 | 0.1                | 0.79     | 0.88 | 0.10              | 0.89     | 0.96 | -0.3               | 0.58     | 0.79 |
| cg03536816 | -1.54             | 0.72     | 0.87 | -4.8               | 0.17     | 0.56 | 4.30              | 0.03     | 0.38 | -0.44              | 0.79     | 0.79 |
| cg08559914 | 0.12              | 0.85     | 0.87 | -0.4               | 0.33     | 0.56 | 0.58              | 0.49     | 0.96 | -0.76              | 0.33     | 0.79 |
| cg16734967 | 1.81              | 0.55     | 0.87 | -3.05              | 0.19     | 0.56 | 0.87              | 0.65     | 0.96 | -0.49              | 0.65     | 0.79 |
| cg10408040 | 0.87              | 0.33     | 0.87 | -0.5               | 0.40     | 0.56 | -0.47             | 0.31     | 0.96 | -0.38              | 0.10     | 0.79 |
| cg05241917 | 0.57              | 0.62     | 0.87 | 0.17               | 0.82     | 0.88 | 0.33              | 0.64     | 0.96 | 0.18               | 0.69     | 0.79 |
| cg20119767 | 1.53              | 0.17     | 0.87 | 1.23               | 0.33     | 0.56 | -0.05             | 0.96     | 0.96 | -0.24              | 0.75     | 0.79 |
| cg04013915 | 1.89              | 0.59     | 0.87 | -2.55              | 0.35     | 0.56 | 0.75              | 0.55     | 0.96 | -0.46              | 0.68     | 0.79 |
| cg16716680 | -0.32             | 0.83     | 0.87 | 1.29               | 0.45     | 0.56 | -0.13             | 0.95     | 0.96 | 0.75               | 0.32     | 0.79 |
| cg25176872 | 1.03              | 0.16     | 0.87 | -1.22              | 0.21     | 0.56 | 0.02              | 0.96     | 0.96 | -0.09              | 0.74     | 0.79 |
| cg22422976 | -0.4              | 0.79     | 0.87 | 0.01               | 0.99     | 0.99 | 0.31              | 0.42     | 0.96 | -0.23              | 0.41     | 0.79 |
| cg05039749 | 0.47              | 0.50     | 0.87 | -0.24              | 0.25     | 0.56 | 0.01              | 0.93     | 0.96 | 0.11               | 0.15     | 0.79 |
| cg23232263 | -0.39             | 0.82     | 0.87 | -0.84              | 0.43     | 0.56 | 0.16              | 0.64     | 0.96 | -0.42              | 0.19     | 0.79 |

**Figure S1.** Scatter plots, and Pearson's DNA correlation coefficients between children's chronological age and DNA methylation aging biomarkers A) Skin & Blood Clock and B) methylation estimator of telomere length (DNAmTL) in nasal cells.

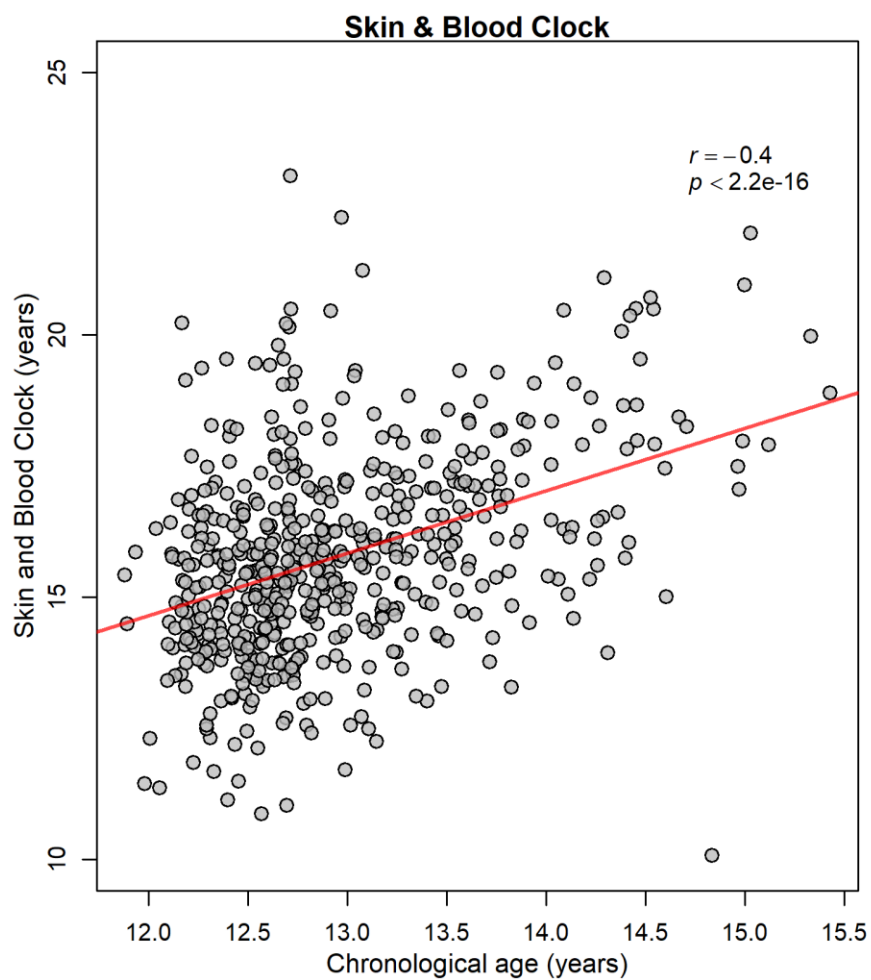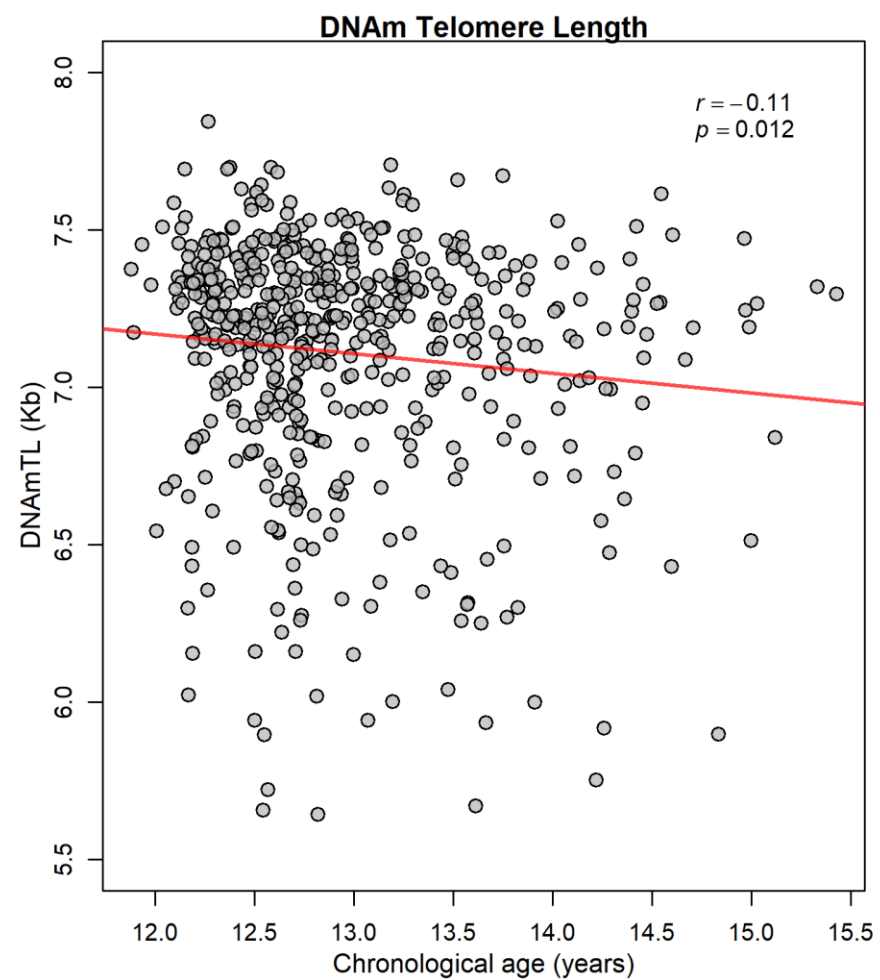

Supplement: Supplementary file [file 2020.08.25.20182105-1.pdf]
